# Supplementary material for: Carbon nanotube sorting due to commensurate molecular wrapping
Source: Royal Society of Chemistry journal article supplement (doi:10.1039/d0nr03236k), 2020-01-01
Supplement: d0nr03236k1.pdf [file d0nr03236k1.pdf]

*#Supplementary materials: MAPLE program*

*#Carbon nanotubes sorting due to commensurate molecular wrapping by Olga V. Konevtsova, Daria S. Roshal, Vladimir P. Dmitriev and Sergei B. Rochal*

*#Calculation of geometric parameters for possible nanotube coatings. Equations (4-7) from the Paper are applied. The results presented in Tables 1 and 2 were obtained using this program.*

*restart;*

*#setting the direction vector  $\mathbf{S} = \langle h, k \rangle$*

*$h := -\frac{2}{3} : k := \frac{7}{3} : \#selected indexes correspond to the vector  $\mathbf{S}_1$ , see section 'General approach to the SWCNT selection...'$*

*#distance between the tube and the coating*

*dist := 0.34 :*

*#distance between positions of neighboring carbon atoms*

*a0 := 0.142 :*

*#setting the path to the file where the results are written*

*ff := fopen("D:\rez.txt", WRITE) :*

*#output of the table header*

*fprintf(ff, " n m d Ns Dz S T alpha\n") :*

*#iterate over all possible indices of nanotubes*

**for n from 0 to 20 by 1 do**

**for m from 0 to 20 by 1 do**

**if ((m + n) > 1) then**

*Q := sqrt(m<sup>2</sup> + m·n + n<sup>2</sup>) :*

*#nanotube diameter*

*d := evalf(  $\frac{Q}{\text{Pi}} \cdot a0 \cdot \text{sqrt}(3)$  );*

*#number of molecules per one loop of the helix (see formula (5) in the Paper)*

*Ns := evalf(  $\frac{2(m^2 + m \cdot n + n^2)}{(2n + m) \cdot h + (2m + n) \cdot k}$  );*

*#projection of the vector  $\mathbf{S}$  on the tube axis*

*Sz :=  $\frac{\text{sqrt}(3) \cdot (-m \cdot h + n \cdot k)}{2 \cdot Q}$  :*

*#pitch of the helix*

*Dz := evalf(Ns·Sz·sqrt(3)·a0);*

*#side length S of coating supercells*

*S := evalf(  $\text{sqrt}\left( Sz^2 \cdot 3 \cdot (a0)^2 + \frac{(Q \cdot \text{sqrt}(3) \cdot a0 + 2 \cdot \text{Pi} \cdot \text{dist})^2}{Ns^2} \right)$  );*

*#integer part of the number Ns*

*Z := trunc(Ns);*

*#side length T (T' in the paper) of coating supercells*

*T := sqrt(  $\frac{(Q \cdot \text{sqrt}(3) \cdot a0 + 2 \cdot \text{Pi} \cdot \text{dist})^2}{Ns^2} (\text{frac}(Z - Ns + 1))^2 + (Dz + Sz \cdot \text{sqrt}(3) \cdot a0 \cdot (\text{frac}(Z - Ns + 1)))^2$  );*

*#calculating projections for basic nanotube spiral wrapped along the <1, -1 > direction*

$$Ap := \text{evalf}\left(\frac{((2n + m) - (2m + n)) \cdot (Q \cdot \sqrt{3}) \cdot a0 + 2 \cdot \text{Pi} \cdot \text{dist}}{2 \cdot Q^2 \cdot \sqrt{3}) \cdot a0}\right) :$$

$$Az := \text{evalf}\left(\frac{\sqrt{3}) \cdot (-m - n)}{2 \cdot Q}\right) :$$

*#calculating  $T' = \langle Tp, Tz \rangle$  projections onto the vector  $P$  and tube axis*

$$Tp := \text{evalf}\left(\frac{(Q \cdot \sqrt{3}) \cdot a0 + 2 \cdot \text{Pi} \cdot \text{dist}}{Ns} \cdot (\text{frac}(Z - Ns + 1))\right) :$$

$$Tz := \text{evalf}(Dz + Sz \cdot \sqrt{3}) \cdot a0 \cdot (\text{frac}(Z - Ns + 1)) :$$

*#angle  $\alpha$  between the vector  $T'$  and the direction vector of the basic nanotube spiral*

$$\alpha := 180 - \text{evalf}\left(\frac{\arccos\left(\frac{(Az \cdot Tz + Ap \cdot Tp)}{\sqrt{(Az^2 + Ap^2)} \cdot \sqrt{(Tz^2 + Tp^2)}}\right) \cdot 180}{\text{Pi}}\right) ;$$

*#printing the geometrical parameters for limited values of the diameter*

**if** ( $d > 0.47$ ) **and** ( $d < 1.22$ ) **then**

*fprintf* (*ff*,

"%2.0f %2.0f %2.2f %2.2f %2.2f %2.2f %2.2f %2.2f\n", *n*,  
*m*, *d*, *Ns*, *Dz*, *S*, *T*, *Re*( $\alpha$ )) ;

**fi**;

**od**;

**od**;

*fclose* (*ff*) :
